# Supplementary material for: Development and Evaluation of an In-House Real-Time RT-PCR Targeting nsp10 Gene for SARS-CoV-2 Detection
Source: MDPI journal article supplement (doi:10.3390/ijms25063552), 2024-03-21
Supplement: s1 [file s1]

Supplementary Table S2. The Uniform Resource Locator (URL) links, their respective regular links, and their respective access dates shown in Supplementary Table S1.

| Link description                           | Doi link               | Regular link                                                                                                        | Access date     |
|--------------------------------------------|------------------------|---------------------------------------------------------------------------------------------------------------------|-----------------|
| Acknowledgement<br>of Data<br>Contributors | 10.55876/gis8.240125wy | <a href="https://epicov.org/epi3/epi_set/240125wy?main=true">https://epicov.org/epi3/epi_set/240125wy?main=true</a> | 31 January 2024 |
| Official hCoV-19<br>Reference<br>Sequence  | N/A                    | <a href="https://gisaid.org/WIV04/">https://gisaid.org/WIV04/</a>                                                   | 31 January 2024 |
