# Supplementary material for: Development and Evaluation of an In-House Real-Time RT-PCR Targeting nsp10 Gene for SARS-CoV-2 Detection
Source: MDPI journal article supplement (doi:10.3390/ijms25063552), 2024-03-21
Supplement: s1 [file s1]

|                  |     |              |                                                                                                                           |
|------------------|-----|--------------|---------------------------------------------------------------------------------------------------------------------------|
| Ancestral        | NC  | 045512.2     | TGGTGCATCGTGTGGTCTGTACTGCCGTTGCCACATAGATCATCCAAATCCTAAAGGATTTTGTGACTTAAAAGGTAAGTATGTACAAATACCTACAACCTTGTGCTAATGACCCGTGTGG |
| Alpha            | EPI | ISL 3547094  | .....                                                                                                                     |
| Alpha            | EPI | ISL 11256669 | .....                                                                                                                     |
| Alpha            | EPI | ISL 11520713 | .....                                                                                                                     |
| Beta             | EPI | ISL 4648928  | .....                                                                                                                     |
| Beta             | EPI | ISL 5053750  | .....                                                                                                                     |
| Beta             | EPI | ISL 12045322 | .....                                                                                                                     |
| Gamma            | EPI | ISL 1969692  | .....                                                                                                                     |
| Gamma            | EPI | ISL 9806818  | .....                                                                                                                     |
| Gamma            | EPI | ISL 10631767 | .....                                                                                                                     |
| Delta            | EPI | ISL 10880057 | .....                                                                                                                     |
| Delta            | EPI | ISL 12266885 | .....                                                                                                                     |
| Delta            | EPI | ISL 12019364 | .....                                                                                                                     |
| Epsilon          | EPI | ISL 2887416  | .....                                                                                                                     |
| Epsilon          | EPI | ISL 18739600 | .....                                                                                                                     |
| Epsilon          | EPI | ISL 3776979  | .....                                                                                                                     |
| Zeta             | EPI | ISL 1198821  | .....                                                                                                                     |
| Zeta             | EPI | ISL 18426450 | .....                                                                                                                     |
| Zeta             | EPI | ISL 17544000 | .....                                                                                                                     |
| Eta              | EPI | ISL 16347671 | .....                                                                                                                     |
| Eta              | EPI | ISL 18120597 | .....                                                                                                                     |
| Eta              | EPI | ISL 2740636  | .....                                                                                                                     |
| Theta            | EPI | ISL 2423558  | .....                                                                                                                     |
| Theta            | EPI | ISL 2501733  | .....                                                                                                                     |
| Theta            | EPI | ISL 1244897  | .....                                                                                                                     |
| Iota             | EPI | ISL 17577493 | .....                                                                                                                     |
| Iota             | EPI | ISL 18017084 | .....                                                                                                                     |
| Iota             | EPI | ISL 13857894 | .....                                                                                                                     |
| Kappa            | EPI | ISL 16347668 | .....                                                                                                                     |
| Kappa            | EPI | ISL 3777162  | .....                                                                                                                     |
| Kappa            | EPI | ISL 12388136 | .....                                                                                                                     |
| Lambda           | EPI | ISL 3076712  | .....                                                                                                                     |
| Lambda           | EPI | ISL 8874883  | .....                                                                                                                     |
| Lambda           | EPI | ISL 4475841  | .....                                                                                                                     |
| Mu               | EPI | ISL 2933815  | .....                                                                                                                     |
| Mu               | EPI | ISL 8367942  | .....                                                                                                                     |
| Mu               | EPI | ISL 9763927  | .....                                                                                                                     |
| Omicron BA.1     | EPI | ISL 8880082  | .....                                                                                                                     |
| Omicron BA.2     | EPI | ISL 11413841 | .....                                                                                                                     |
| Omicron BA.3     | EPI | ISL 12197863 | .....                                                                                                                     |
| Omicron BA.4     | EPI | ISL 12256369 | .....                                                                                                                     |
| Omicron BA.5     | EPI | ISL 12291987 | .....                                                                                                                     |
| Omicron XBB      | EPI | ISL 18743678 | .....                                                                                                                     |
| Omicron JN.1     | EPI | ISL 18652540 | .....                                                                                                                     |
| nCoV nsp10-F     |     |              | .....                                                                                                                     |
| nCoV nsp10-probe |     |              | .....                                                                                                                     |
| nCoV_nsp10-R*    |     |              | .....                                                                                                                     |

\* Reverse complement

# Figure legend of Figure S1

Multiple sequence alignment of our primer and probe sequences and the nsp10 gene sequences of SARS-CoV-2 variants from different geographical regions. The alignment contains the primer and probe sequences with other reference sequences. The dots represent bases which were the same as the one in the ancestral sequence (NC\_045512.2). The ‘~’ (tilde) symbols in the figure represent gaps in the alignment. However, the gaps do not represent deletions in the sequence.
